# Supplementary material for: Identification of a duplication within the GDF9 gene and novel candidate genes for primary ovarian insufficiency (POI) by a customized high-resolution array comparative genomic hybridization platform
Source: PubMed Central journal article supplement — Hum Reprod. 2014 Jun 17;29(8):1818–27. doi: 10.1093/humrep/deu149 (PMC4093997; doi:10.1093/humrep/deu149), 2014-06-17
Supplement: supp_deu149_deu149supp_table1.pdf [file supp_deu149_deu149supp_table1.pdf]

**Supplementary Table I** Genes targeted by probe enrichment.

| <i>ADAM8</i>   | <i>DHH</i>    | <i>FIGLA</i> | <i>HOXA13</i>  | <i>NR6A1</i>  | <i>SRD5A2</i> |
|----------------|---------------|--------------|----------------|---------------|---------------|
| <i>AR</i>      | <i>DIAPH2</i> | <i>FKBP4</i> | <i>HSD17B3</i> | <i>PBX1</i>   | <i>SRY</i>    |
| <i>ARX</i>     | <i>DMRT1</i>  | <i>FOXL2</i> | <i>HSD3B2</i>  | <i>PDGFRA</i> | <i>STAR</i>   |
| <i>ATRX</i>    | <i>DMRT2</i>  | <i>FOXO1</i> | <i>INHHA</i>   | <i>PGRMC1</i> | <i>STRA8</i>  |
| <i>BMP15</i>   | <i>DMRT3</i>  | <i>FOXO3</i> | <i>JAK3</i>    | <i>POF1B</i>  | <i>SUPT3H</i> |
| <i>CBX2</i>    | <i>DMRTA1</i> | <i>FSHB</i>  | <i>LHB</i>     | <i>POR</i>    | <i>TAF4B</i>  |
| <i>CXorf6</i>  | <i>DMRTA2</i> | <i>FSHR</i>  | <i>LHCGR</i>   | <i>POUSF1</i> | <i>TCF21</i>  |
| <i>CYP11A1</i> | <i>DMRTB1</i> | <i>GATA4</i> | <i>LHX8</i>    | <i>RSPO1</i>  | <i>TGFBR3</i> |
| <i>CYP17A1</i> | <i>DMRTC1</i> | <i>GATA6</i> | <i>LHX9</i>    | <i>RXFP2</i>  | <i>TSPYL1</i> |
| <i>CYP19A1</i> | <i>DMRTC2</i> | <i>GDF9</i>  | <i>MOS</i>     | <i>SOHLH1</i> | <i>WNT4</i>   |
| <i>CYP51A1</i> | <i>EMX2</i>   | <i>GLP-1</i> | <i>NOBOX</i>   | <i>SOX3</i>   | <i>WT1</i>    |
| <i>DDX4</i>    | <i>FGF9</i>   | <i>GPR3</i>  | <i>NR0B1</i>   | <i>SOX8</i>   | <i>ZAR1</i>   |
| <i>DHCR7</i>   | <i>FGFR2</i>  | <i>HIFOO</i> | <i>NR5A1</i>   | <i>SOX9</i>   | <i>ZFPM2</i>  |
