# Supplementary material for: Identification of a duplication within the GDF9 gene and novel candidate genes for primary ovarian insufficiency (POI) by a customized high-resolution array comparative genomic hybridization platform
Source: PubMed Central journal article supplement — Hum Reprod. 2014 Jun 17;29(8):1818–27. doi: 10.1093/humrep/deu149 (PMC4093997; doi:10.1093/humrep/deu149), 2014-06-17
Supplement: supp_deu149_deu149supp_table2.pdf [file supp_deu149_deu149supp_table2.pdf]

**Supplementary Table II MLPA probes.**

| Probe name         | Cytoband | Size (bp) | 5' half-probe <sup>a</sup>                  | 3' half-probe <sup>b</sup>                                 | Comment | SD   |
|--------------------|----------|-----------|---------------------------------------------|------------------------------------------------------------|---------|------|
| GABRA              | 4p12     | 84        | CAGCCTGTTGCATAACCATCG                       | AGCAAAGTTCAGGATGCG                                         | Pilot   |      |
| RELN2              | 7q22.1   | 87        | CAGCATTACGGAATGAAGGTCA                      | CCACAAGAAGTGGCTTACAACC                                     | Control | 0.04 |
| KRTAP2-1           | 17q21.2  | 93        | CCCGGAACGCGTAACTCACCTT                      | CTGAAAAAGTCACACTCCCATTCTCTAC                               | A       | 0.05 |
| UQCRQ              | 5q31.1   | 93        | CACAGTCACCGATCCGGTTGACTCGTT                 | CGTCATTTCCGGCAAGGTTGGAAG                                   | GDF9    | 0.08 |
| C5IGS1             | 5q31.1   | 96        | GCTTTTCCACATGCCTTAGAAGTTTCAGC               | AAGCACCTAGCGAACATCTTAATCC                                  | GDF9    | 0.04 |
| SH3GL3             | 15q25.2  | 96        | GAACCTGAGGCCAGCTCTAACAGTCTT                 | TCATGGATGCATACACCTGCCTGCAG                                 | A       | 0    |
| C2ORF67            | 2q34     | 99        | CAAATCGTCATCAGAGCTGCTATCAGTTGCA             | TCGGAATCCAAACCCTCTTCAACATG                                 | A       | 0.03 |
| C5IGS2             | 5q35.1   | 99        | GTAGACAAAGGAGGTGGTGCAAGAGCGCAA              | ACTACTTCATGGGGAGGACGTCTCAG                                 | GDF9    | 0.05 |
| CXIGS1             | Xp22.33  | 99        | CAAAATTAAGTGTAGGATTCATTTTCTGC               | ATCTACACATCACTGGCATAGGCTCTG                                |         |      |
| DAX1               | Xp21.2   | 102       | GCAGCCTCAGCGGCCTGTTGAAGACGCTG               | CGCTTCGTCAGTACTTGCCCTGCTTCCAG                              | Control | nd   |
| KRTAP2-3           | 17q21.2  | 102       | GATCCTCAAGCACGAATCAACAATAACAT               | CCTATCTATTTCCCCACATAATTATGCAGC                             | A       | 0.03 |
| PCLN1 <sup>c</sup> | 3q28     | 105       | GACACAAGGSGTGTAAATGCACG                     | TTTCAGGGTGTGTTGCATATGATTTAATCAATCAGTATG                    | Control | 0.04 |
| CACNA1C_3          | 12p13.33 | 108       | CTCCTTCAGGCTTGATTTGAGAAGGACTGGGGC           | AGTTTGCTCAAGATCCCAAGTTCATCGAGGTC                           |         |      |
| DNAH6              | 2p11.2   | 108       | GTTTCCTGAGTGACTTCCACCAGCTGTAAGC             | AAACTGCATCAAGCATTGTAGAAGCCTCAGTTG                          | A       | 0.03 |
| GDF9_exon2-1       | 5q31.1   | 108       | CCTTCCATCAGTGGAACTGCTATTTAACCTGGAT          | CGCATTACTACCGTTGAACACTTACTCAAGTC                           | GDF9    | 0.09 |
| GDF9_exon1-1       | 5q31.1   | 111       | GCAGCTGATAACCTTATTTAGCCAATTT                | GTTAATTAGATACAGATTTACTTGGTTATTTAGCTTTCC                    | GDF9    | 0.04 |
| KRTAP2-4           | 17q21.2  | 111       | GTGGACTTTCGAAACACATTTACAACCTGATGG           | TTTTTACTGCTCAAAGTGCACCATCATCTTTTGC                         | A       | 0.04 |
| SH3GL3_2           | 15q25.2  | 111       | CTTTGCTGGGATAATATGCAATCAAGCTAATAGGTGCC      | TTACCTGGACCTCCCAACAGGTAATAAATGG                            |         |      |
| SMARCC1            | 3p21.31  | 111       | CCTGCCAAAGGTGATCAGAGTCGATCAGTTGA            | CCTTGGGGAAGATAATGTGACAGAGCAGACCAATCAC                      |         |      |
| C5IGS5             | 5q31.1   | 114       | GTATACTAATTCTCCTTGTAACTAGCATATATAAATCAATCG  | AGTCACACAGAACAATATAACATTTGTCC                              | GDF9    | 0.08 |
| TJP3               | 19p13.3  | 114       | CCCGTGGCCGACATTGCTATGCAGAAGTTGACT           | GCTGAGATGCCTGACCAGTTTGAATCGCAGGTGAGAAG                     | A       | 0.02 |
| C2IGS12            | 2q34     | 117       | GAGTGGAGACCACCTGGACAGTGACAGAGATCACTCATT     | CCCCAGAAAGGTAGCATTATGACTTCAATCCCATC                        |         |      |
| C2IGS13            | 2p16.2   | 117       | CTCTATTGCTATCCTCCATGGCCTGGAGAACGAATGCA      | GGCCTCTTTCTCTTCTACCTATGCAAGATAAGAATG                       |         |      |
| GDF9_exon1-2       | 5q31.1   | 117       | GCCTCCTTCCCGCCTTTTCAAAG                     | TTCTATCTGTTGGGCGAGGTGGGTACCTAGGCTGCAGC<br>CAGACTCCAGAG     | GDF9    | 0.03 |
| P2RY8              | Xp22.33  | 117       | GCTACTACCACGTGTACAAGCTCACGCTGTGTCTCA        | GCTGCCTCAACAAGTGTCTGGACCCGTTTGTATTAC                       | A       | 0.03 |
| KRTAP2-2           | 17q21.2  | 120       | CATACTAGCTCACACTATGCATTGAAGACACCTTTT        | CAGACCAACCACAGATGAGAAATCTTTTCTAGGACTCCAG                   | A       | 0.02 |
| SRY                | Yp11.31  | 120       | GAATGCGAAAAGTCAAGATCAGCAAGCAGCTGGGA         | TACCAGTGGAAAATGCTTACTGAAGCCGAAAAATGGCCATTCC                | Control | nd   |
| C15IGS2            | 15q26.2  | 123       | GGAATATCCCATCGTTACTTAGGTGTCAATATGTGTAT      | CAGATGACTGGATTAGTATTTTAAACAGCAATGGCAAAGAAG                 |         |      |
| CSPG5              | 3p21.31  | 123       | GCCTGCTTACTTATACGATGATTTACCCCCCTTCGATGAATCT | GATTTCACCCACCACATCCTTTTATGATGACTTGG                        | A       | 0.03 |
| D.NAH6_2           | 2p11.2   | 123       | GTCACACCTACACCCTGCAGGAATTTAA                | GGCCGCACAAGTCATACGGCTAGCAGAGGTAACAAATTTTGTCT<br>TATAAGAATC |         |      |
| GDF9_exon2-2       | 5q31.1   | 123       | CTTCCCATCACCGTCACCGCAGAGGTGAGGAACTGTCAGTT   | CTGAATTGAAGAAGCCCTTGGGCCAGCTTCTTCAATC                      | GDF9    | 0.02 |
| C5IGS4             | 5q31.1   | 126       | CCCATTGCTCAAGGTCTTACATACAAAGCAAGAGATGGCTT   | CTAAGGGTTCTAACCACTCTGATGTTTTAAGCATGTGTC                    | GDF9    | 0.04 |
| KRTAP2-3_2         | 17q21.2  | 126       | GTGGAGTCTCATCTGATCCAGAAGGGGTAGAAGAGTCTGC    | ACAAGCTTCTGTGCACCTGGGAATGTTTCGTGCGTTGAGAGG                 |         |      |
| TSPYL6             | 2p16.2   | 126       | GTGGTTGAGGGGACATGTCAGACCCTATCCTCAT          | GGCAAGGTTAATATGTTGGTGTCTTGACAAGTACCAGGCTTT<br>CTCAGCC      | A       | 0.03 |

|           |          |     |                                                   |                                                |         |      |
|-----------|----------|-----|---------------------------------------------------|------------------------------------------------|---------|------|
| RBI ex23  | 13q14.2  | 129 | GTCACCAATACCTCACATTCTCGAAGCCCTTACAAGTTTCCT        | AGTTCACCCTTACGGATTCTGGAGGGAACATCTATATTTACC     | Control | 0.03 |
| CREBBP    | 16p13.3  | 131 | CCAGACCCACCCAGGCCCTCCTCAATAGTAACTCTGGCCATAGCTTAAT | TAATCAGGCTTCACAAGGGCAGGCGCAAGTCATGAATGGATC     | Control | 0.03 |
| CACNA1C   | 12p13.3  | 132 | CTGTGTGCATATGTCCTGCCCGTGTATATGCACCCACACCATGTGCCCG | TGCACACCAGTGACTACGCAGTCCCCCCTTTCTGGTTTAGC      | A       | 0.03 |
| C15IGS1   | 15q26.2  | 135 | CCTACTTTTTCTGACACTGTGCTATGTTTTGAATTCTGTAGGAATCC   | TTGGCGGAAGTTGCCTTCAGCATTTTAGGCCTGTCTAAACAGGTAG |         |      |
| CACNA1C_2 | 12p13.33 | 135 | GATGATTTGTAACACACAGTCTGTGCAGAAAGATCCCCTTCAGGAGG   | TGTCTCCAGCATCCCAAAGCTGTGCGCACCTTCTCTTTTCCTGC   |         |      |

Bp, basepair; SD, Standard deviation in probe validation; A, included in an MLPA kit for screening of array-CGH findings; GDF9, included in the MLPA kit for *GDF9* analysis; nd, not determined.

<sup>a</sup>The 5' half-probes are preceded by the universal tag sequence GGGTTCCTAAGGGTTGGA.

<sup>b</sup>The 3' half-probes are followed by the universal tag sequence TCTAGATTGGATCTTGTGGCAC.

<sup>c</sup>From Stern *et al.* (2004).
