# Supplementary material for: Identification of a duplication within the GDF9 gene and novel candidate genes for primary ovarian insufficiency (POI) by a customized high-resolution array comparative genomic hybridization platform
Source: PubMed Central journal article supplement — Hum Reprod. 2014 Jun 17;29(8):1818–27. doi: 10.1093/humrep/deu149 (PMC4093997; doi:10.1093/humrep/deu149), 2014-06-17
Supplement: supp_deu149_deu149supp_table3.pdf [file supp_deu149_deu149supp_table3.pdf]

---

**Supplementary Table III PCR primers.**

| <b>Primer name</b> | <b>Sequence</b>           |
|--------------------|---------------------------|
| GDF9-dupl F        | CAGCTGCTTGATATAGAGCTGATAA |
| GDF9-dupl R        | CTCACGGCCTTTTCCACTTC      |
| KRTAP2-3 F         | CCAGAGTGGAACGAGGACAT      |
| KRTAP2-3 R         | GATCAGCTAGGCTGCAAAGG      |
| KRTAP2-4 R         | GTGGGTGAGGGTGGTAATGG      |
| KRTAP2-4 F         | GCCAGGGTATATAAAGGGCCC     |
| TSPYL-6 A F        | AAAGACACCACCACAGACTCG     |
| TSPYL-6 A R        | GCCCCACAGGTTTCTAGAGC      |
| TSPYL-6 B F        | GCAGGAAGTGACTCCACCAC      |
| TSPYL-6 B R        | CCTTCACTTCCAAATTGGTTAAG   |
| TSPYL-6 C F        | GCTTCTGGGTCACTGCTTTC      |
| TSPYL-6 C R        | GTAAAGGGCATACTAATGCTGT    |

F, forward; R, reverse.
